# Supplementary material
Source: PubMed Central journal article supplement (PMC3579954)
Supplement: 11606_2012_2257_MOESM1_ESM.pdf [file 11606_2012_2257_MOESM1_ESM.pdf]

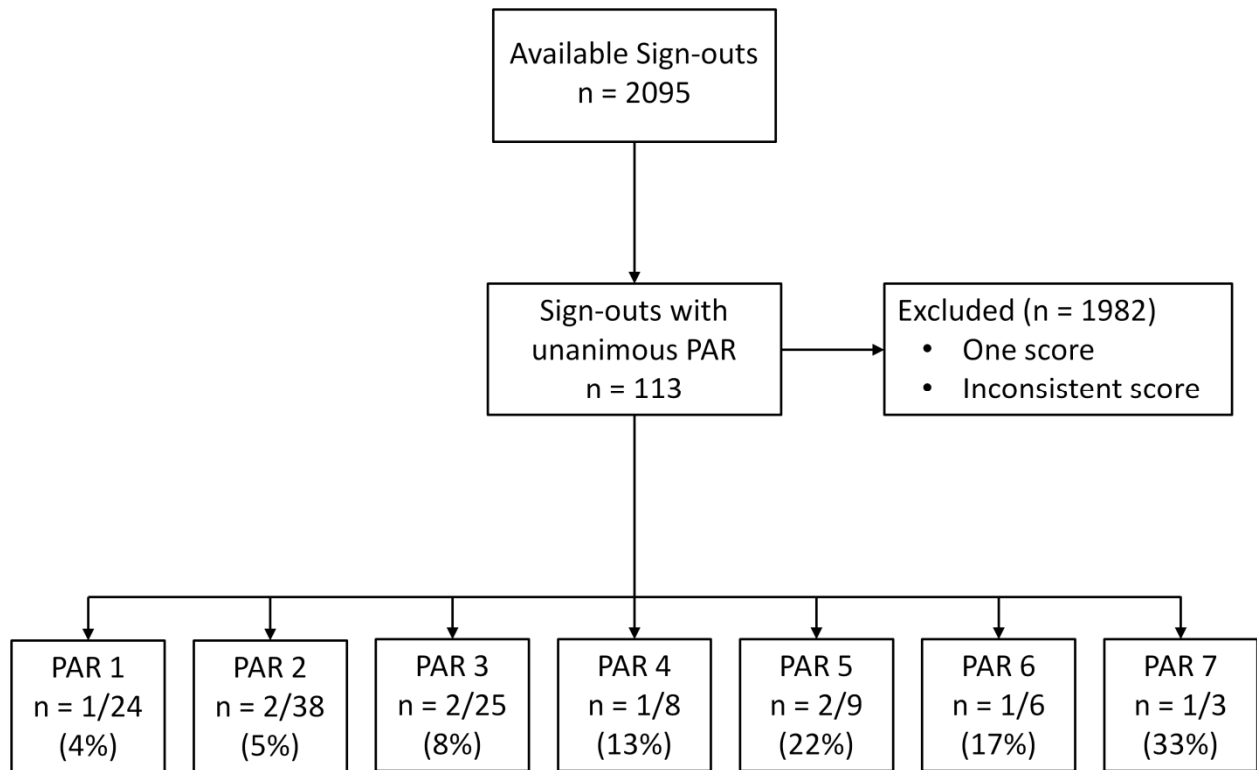

**Appendix Figure 1.** Inclusion process for sign-outs used in study. PAR, Patient Acuity Rating.

**Appendix Table 1:** Patient conditions and corresponding PAR score for each survey sign-out.

| Patient | PAR | Patient Description                                                                                                |
|---------|-----|--------------------------------------------------------------------------------------------------------------------|
| A       | 1   | 89 year old female with lumbar compression fracture and hypercalcemia.                                             |
| B       | 2   | 53 year old female with COPD exacerbation.                                                                         |
| C       | 2   | 44 year old male with chronic pancreatitis flare.                                                                  |
| D       | 3   | 43 year old male with pneumococcal pneumonia. Transferred from the MICU following prolonged stay for septic shock. |
| E       | 3   | 90+ year old female with atypical pneumonia and knee pain.                                                         |
| F       | 4   | 84 year old female with Afib and INR of 7.3.                                                                       |
| G       | 5   | 31 year old female with AIDS, gastroenteritis and prerenal azotemia.                                               |
| H       | 5   | 76 year old female INR >15, and resolved hematochezia, hematuria, and hematemesis.                                 |
| I       | 6   | 31 year old female with AIDS, new cavitating lung lesions, and hypoglycemia (blood sugar 46).                      |
| J       | 7   | 90+ year old female with large pleural effusion, hypovolemia, and oxygen requirement who is DNR/DNI.               |

PAR, patient acuity rating; COPD, chronic obstructive pulmonary disorder; MICU, medical intensive care unit; Afib, atrial fibrillation; INR, international normalized ratio; AIDS, acquired immune deficiency syndrome; DNR, Do-Not-Resuscitate; DNI, Do-Not-Intubate.

**Appendix Table 2:** Responses before and after revealing primary team PAR by patient.

| Patient | PAR | Concern for patient stability |            | Importance of immediate bedside evaluation |            |
|---------|-----|-------------------------------|------------|--------------------------------------------|------------|
|         |     | Pre-PAR                       | Post-PAR   | Pre-PAR                                    | Post-PAR   |
| A       | 1   | 3.1 ± 1.0                     | 2.3 ± 0.8  | 3.2 ± 1.1                                  | 2.4 ± 0.9  |
| B       | 2   | 3.1 ± 0.8                     | 2.6 ± 0.6  | 3.4 ± 1.0                                  | 2.8 ± 0.9  |
| C       | 2   | 2.8 ± 0.8                     | 2.4 ± 0.6  | 2.9 ± 0.8                                  | 2.4 ± 0.8  |
| D       | 3   | 4.4 ± 0.6                     | 3.5 ± 0.8  | 4.6 ± 0.6                                  | 3.6 ± 0.9* |
| E       | 3   | 3.0 ± 0.9                     | 2.9 ± 0.7* | 3.2 ± 0.9                                  | 3.0 ± 0.7  |
| F       | 4   | 3.4 ± 1.0                     | 3.5 ± 0.7* | 3.6 ± 1.1                                  | 3.6 ± 0.9  |
| G       | 5   | 3.9 ± 0.9                     | 4.1 ± 0.7* | 3.8 ± 1.0                                  | 4.1 ± 0.7* |
| H       | 5   | 4.5 ± 0.6                     | 4.1 ± 0.6  | 4.5 ± 0.7                                  | 4.3 ± 0.7  |
| I       | 6   | 3.6 ± 0.9                     | 4.4 ± 0.5* | 3.6 ± 1.0                                  | 4.5 ± 0.6* |
| J       | 7   | 3.8 ± 0.7                     | 4.6 ± 0.5* | 3.9 ± 0.8                                  | 4.8 ± 0.5* |

\*P<0.05 for two-sided variance comparison test pre- and post-revealing of the primary team assigned PAR. PAR, Patient Acuity Rating.
